1 **SARS-CoV-2 variants of concern, variants of interest and lineage A.27 are on**  
2 **the rise in Côte d'Ivoire**

3 Etilé Augustin Anoh<sup>1\*</sup>, Grit Schubert<sup>2\*</sup>, Oby Wayoro<sup>1</sup>, Monemo Pacôme<sup>1,3</sup>, Essia Belarbi<sup>2</sup>,  
4 Andreas Sachse<sup>2</sup>, Sébastien Calvignac-Spencer<sup>2</sup>, Fabian Leendertz<sup>2</sup>, Bamourou Diané &  
5 Chantal Akoua-Koffi<sup>1,3</sup>

6

7 Affiliations

8 <sup>1</sup> Centre Hospitalier Universitaire Bouaké, Côte d'Ivoire

9 <sup>2</sup> Robert Koch-Institute, Berlin, Germany

10 <sup>3</sup> Université Alassane Ouattara de Bouaké, Côte d'Ivoire

11

12 \* these authors contributed equally to this work

13

14 Correspondence: anohethyl@yahoo.fr, schubertg@rki.de, CalvignacS@rki.de,

15 cakoua26@gmail.com

16

17 Keywords

18 SARS-CoV-2, VOC, VOI, whole genome sequencing, ARTIC protocol, sub-Saharan Africa

19

20 Abstract

21 SARS-CoV-2 variants of concern (VOC) and variants of interest (VOI) are heavily altering the

22 COVID-19 pandemic's course due to their increased transmissibility, virulence and immune

23 escape abilities. Data on their spread in western sub-Saharan Africa is however still scarce.

24 We therefore sequenced viral genomes from SARS-CoV-2 cases identified in central and

25 northern Côte d'Ivoire between May 2020 and March 2021. We report the introduction of  
26 VOC B.1.1.7 as early as mid-January 2021, followed by detection of a single case of VOC  
27 B.1.351, as well as VOI B.1.525. Since early 2021 VOC/VOI are gradually dominating the  
28 SARS-CoV-2 virus pool in Côte d'Ivoire, as seen in other regions of the world. Intriguingly, we  
29 also find that another lineage, A.27, has also been on the rise over the same period. In sum,  
30 this study highlights again the extremely rapid local diffusion of VOC, VOI and possibly A.27,  
31 and the importance of further reinforcing capacities for genomic surveillance on the African  
32 continent.

33

#### 34 Competing interests

35 The authors declare that they have no competing interests.

36

#### 37 Funding

38 The study is funded by two grants from the German Federal Ministry of Education and  
39 Research (BMBF; grant number 01KA1606; grant number 01KI2047). The funding body had  
40 no role in the design of the study and collection, analysis, and interpretation of data and in  
41 writing the manuscript.

42

#### 43 Main Text

44 The ongoing SARS-CoV-2 pandemic is coined by the emergence and spread of viral lineages  
45 with increased transmissibility, virulence and immune escape abilities, the variants of  
46 concern [VOC; (1, 2)]. Since end-2020, three VOC - B.1.1.7 which originated in the U.K  
47 (20I/501Y.V1), B.1.351 (20H/501Y.V2) from South Africa, and P.1 (20J/501Y.V3) from Brazil -  
48 have shown sustained regional community transmission followed by quick international

49 dispersal. B.1.1.7 is now on the verge to becoming the dominant lineage worldwide. The  
50 ramping up of genomic surveillance on a global scale has also resulted in the identification of  
51 other variants presenting mutations potentially associated with altered phenotypes but not  
52 yet formally identified as exhibiting altered properties, the variants of interest [VOI; (2)]. As  
53 of March 30<sup>th</sup>, WHO has identified 6 VOI associated to local community transmission and  
54 some degree of international spread (1).

55 SARS-CoV-2 genomic data have accumulated at very different paces in different regions of  
56 the world and West Africa is among the least covered [see (3, 4) and references therein]. In  
57 order to shed light on the evolution and spread of SARS-CoV-2 and its VOC/VOI in this  
58 region, we sequenced viral genomes from cases identified in central and northern Côte  
59 d'Ivoire between May 2020 and March 2021.

#### 60 **Rapid lineage turn-over to VOC/VOI in central Côte d'Ivoire**

61 We obtained nucleic acids extracted from naso/oropharyngeal specimens from the national  
62 SARS-CoV-2 surveillance program. Those samples had been tested positive for SARS-CoV-2  
63 by real-time PCR. Between May 23<sup>rd</sup> 2020 and March 9<sup>th</sup> 2021, 2637 naso/oropharyngeal  
64 specimens from COVID-19 suspect cases had been received by the Centre Hospitalier  
65 Universitaire (CHU) Bouaké, of which 524 specimens tested positive for SARS-CoV-2. An  
66 additional 8 SARS-CoV-2 positive nucleic acids were obtained from a running surveillance  
67 study on acute respiratory infections in the Bouaké region and western Côte d'Ivoire [ $N_{\text{tested}}$   
68 = 828; (5)].

69 We generated complementary DNA (cDNA) and performed on-site whole genome  
70 sequencing at the CHU Bouaké by applying the multiplex PCR approach described in the  
71 ARTIC protocol (6) and sequencing the resulting amplicons on a MinION device (Oxford  
72 Nanopore Technologies). We also followed the ARTIC protocol for genome consensus

73 sequence generation (7). Genomes were assigned to viral lineages using pangolin [version  
74 2.3.8, April 2<sup>nd</sup> 2021; (8)]. Lastly, we also performed additional phylogenetic analyses aimed  
75 at refining the placement/lineage assignment of 5 genomes initially assigned to lineage A, of  
76 which 4 genomes fell into A.27 diversity and where reassigned accordingly (Supplementary  
77 Figure 1). A total of 166 SARS-CoV-2 genomes were generated, spanning the period from  
78 May 2020 to March 2021.

79 From May 2020 to December 2020, we detected 20 pango lineages, with lineage A.19 being  
80 by far the dominant one, followed by A.18 and B.1 (Figure 1A and B). From January 2021 on,  
81 the distribution of viral lineages changed drastically (Figure 1C). We detected 2 VOCs, B.1.1.7  
82 (first detection January 15<sup>th</sup> 2021) and B.1.351 (a single detection on March 6<sup>th</sup> 2021), and  
83 one VOI, B.1.525 (first detection February 8<sup>th</sup> 2021). The frequency of VOC/VOI gradually  
84 increased from January to March (Figure 1D – F), leading to a rapid replacement of  
85 previously circulating lineages. In March 2021, VOC/VOI altogether represented 67% of  
86 sequenced genomes (Figure 1F).

### 87 **Emergence and rise of lineage A.27**

88 The emergence of VOC/VOI was accompanied by the appearance and increasing frequency  
89 of lineage A.27 (29 % of genomes from January to March 2021; Figure 1D - F). As a number  
90 of VOC/VOI do, A.27 harbours many lineage defining mutations [n=18; (9)]. A.27 genomes  
91 are characterized by a S:614D background and show four coding mutations in spike  
92 potentially linked to increased transmissibility or immune escape [S:L18F, S:L452R, S:N501Y  
93 and S:H655Y; (10-12)]. This lineage was initially defined following an outbreak in Mayotte, a  
94 French overseas territory and island in the Mozambique Channel (13). As of April 1<sup>st</sup> 2021, a  
95 mere 226 A.27 genomes have been published on the GISAID database, primarily from  
96 European countries (14). A.27 was first detected in December 2020 in Denmark but the high

97 proportion of those genomes appearing in France/Mayotte (144 genomes) might pinpoint a  
98 potential origin or early elevated spread of the variant in this country. While prior to this  
99 study only three A.27 genomes had been reported from continental sub-Saharan Africa (two  
100 from Nigeria, one from Rwanda), our results show that that this lineage probably dispersed  
101 much more broadly on the continent.

## 102 **Limitations of the study**

103 The data presented here are geographically limited to central and northern Côte d'Ivoire and  
104 might thus only reflect local outbreak patterns. VOC/VOI/A.27 were probably imported via  
105 travellers but the very uneven international sampling prevents firmly determining the origins  
106 of importation. Potential epidemiological links to southern Côte d'Ivoire, where Abidjan acts  
107 as the main country's hub for international travel, should be investigated to better  
108 understand within country spread.

## 109 **Conclusions**

110 The data presented here highlight again the extremely rapid local diffusion of VOC, VOI and,  
111 possibly, A.27. Monitoring the spread and possibly local emergence of variants provides  
112 information that can guide governmental measures towards pandemic control. In the next  
113 few months, reinforcing genomic surveillance on the continent will be a major regional and  
114 global task.

115

## 116 Ethics approval

117 The study adheres to the tenets of the Declaration of Helsinki and national ethical and  
118 legislation standards. The CHU Bouaké laboratory is part of the national surveillance  
119 programme for SARS-CoV-2 diagnosis in Côte d'Ivoire. Approval by institutional ethics  
120 committees for conducting the ANDEMIA surveillance study was given by the Comité

121 National d’Ethique des Sciences de la Vie et de la Santé de Côte d’Ivoire (ethics permit  
122 number 105/MSHP/CNER-dk), and by the Ethikkommission - Ethikausschuss am Campus  
123 Virchow-Klinikum, Charité, Germany (ethics permit number EA2/230/17)]. The study  
124 objectives were explained by trained surveillance officers, and informed written consent for  
125 participating in the study was collected from all participants. Written consent was obtained  
126 by parents or legal guardians of minors. Personal patient identifiers were not accessible to  
127 the authors. Inclusion of SARS-CoV-2 diagnostics into the study was granted by the Comité  
128 National d’Ethique des Sciences de la Vie et de la Santé de Côte d’Ivoire (ethics permit  
129 number 073-20/MSHP/CNESVS-kp).

130

#### 131 Authors' contributions

132 All authors made substantial contributions towards the conduct of the study. CAK, EB, FL, GS  
133 designed the study. CAK and BD guaranteed study implementation in Côte d’Ivoire. EB, GS  
134 and SCS were driving the development of methodologies and analyses. AS, EAA, GS, MP, OW  
135 and SCS performed analyses. EAA, GS and SCS drafted the manuscript. All authors revised  
136 earlier versions of the manuscript and approved the final version for submission.

137

#### 138 Informed consent

139 Suspect cases of COVID-19 were tested for SARS-CoV-2 during clinical routine, following  
140 national testing guidelines. Patients were aware of the testing and consented to the  
141 sampling of respiratory specimens.

142

#### 143 Data availability

144 All SARS-CoV-2 sequences generated at CHU Bouaké, Côte d’Ivoire, are available on GISAID.

145

146 Acknowledgements

147 We are grateful to S. Tomczyk, T. Eckmanns, K. Nowak, P. Pitzinger, S. Kribi and R. Wood for  
148 their participation in the development and implementation of the broader study idea, and  
149 Caroline Röthemeier and Kevin Merkel for technical support (all Robert Koch-Institute). At  
150 Côte d'Ivoire, we thank Prof. M. Dosso, director of the Institut Pasteur of Côte d'Ivoire and  
151 national coordinator of COVID-19 laboratory activities, for including CHU Bouaké into  
152 respective activities and granting permission to sequencing tested specimens. We further  
153 wish to acknowledge Dr. F. Bamba-Touré, the regional director of health at the Ministry of  
154 Health, as well as Dr. M. Coulibaly at the Institut National d'Hygiène Publique for facilitating  
155 the conduct of the study. Lastly, we extend our thanks to the local SARS-CoV-2 surveillance  
156 team of Dr. M. Soundélé, Dr. L. Karidioula, Dr. P. Ouattara, Dr. I. Dembélé, N. Wohi and S.  
157 Karidiouala for their efforts in implementing the testing of respiratory specimens for SARS-  
158 CoV-2 at CHU Bouaké.

159 We thank the funding body that made this study possible, the German Federal Ministry of  
160 Education and Research (BMBF; grant number 01KA1606 and grant number 01KI2047).

161

162 References

- 163 1. World Health Organization. COVID-19 weekly epidemiological update, 30 March  
164 2021. 2021.
- 165 2. World Health Organization. COVID-19 weekly epidemiological update, 25 February  
166 2021. 2021.
- 167 3. Otu A, Agogo E, Ebenso B. Africa needs more genome sequencing to tackle new  
168 variants of SARS-CoV-2. *Nature Medicine*. 2021:1-2.

- 169 4. Inzaule SC, Tessema SK, Kebede Y, Ouma AEO, Nkengasong JN. Genomic-informed  
170 pathogen surveillance in Africa: opportunities and challenges. *The Lancet Infectious*  
171 *Diseases*. 2021.
- 172 5. African Network for improved Diagnostics, Epidemiology and Management of  
173 Common Infectious Agents – ANDEMIA 2018 [Available from: <https://www.andemia.org/>].
- 174 6. Tyson JR, James P, Stoddart D, Sparks N, Wickenhagen A, Hall G, et al. Improvements  
175 to the ARTIC multiplex PCR method for SARS-CoV-2 genome sequencing using nanopore.  
176 *bioRxiv : the preprint server for biology*. 2020:2020.09.04.283077.
- 177 7. Loman N, Rowe W, Rambaut A. nCoV-2019 novel coronavirus bioinformatics protocol  
178 2020 [Available from: <https://artic.network/ncov-2019/ncov2019-bioinformatics-sop.html>].
- 179 8. O'Toole Á, Scher E, Underwood A, Jackson B, Hill V, McCrone J, et al. Pangolin: lineage  
180 assignment in an emerging pandemic as an epidemiological tool. 2020.
- 181 9. Pango lineages. Lineage A.27 2021 [Available from: [https://cov-](https://cov-lineages.org/lineages/lineage_A.27.html)  
182 [lineages.org/lineages/lineage\\_A.27.html](https://cov-lineages.org/lineages/lineage_A.27.html)].
- 183 10. McCallum M, De Marco A, Lempp FA, Tortorici MA, Pinto D, Walls AC, et al. N-  
184 terminal domain antigenic mapping reveals a site of vulnerability for SARS-CoV-2. *Cell*. 2021.
- 185 11. Nelson G, Buzko O, Spilman PR, Niazi K, Rabizadeh S, Soon-Shiong PR. Molecular  
186 dynamic simulation reveals E484K mutation enhances spike RBD-ACE2 affinity and the  
187 combination of E484K, K417N and N501Y mutations (501Y. V2 variant) induces  
188 conformational change greater than N501Y mutant alone, potentially resulting in an escape  
189 mutant. *BioRxiv*. 2021.
- 190 12. Tchesnokova V, Kulakesara H, Larson L, Bowers V, Rechkina E, Kisiela D, et al.  
191 Acquisition of the L452R mutation in the ACE2-binding interface of Spike protein triggers  
192 recent massive expansion of SARS-Cov-2 variants. *bioRxiv*. 2021:2021.02.22.432189.



193 13. Simon-Loriere E. Potential new lineage causing a cluster in Mayotte 2021 [Available  
194 from: <https://github.com/cov-lineages/pango-designation/issues/11>.

195 14. Elbe S, Buckland-Merrett G. Data, disease and diplomacy: GISAID's innovative  
196 contribution to global health. *Global Challenges*. 2017;1(1):33-46.

197 15. Tennekes M. Treemap: Treemap Visualization. R package version 2.4-2. ed2017.

198

199 Figure legends

200 **Figure 1.** Distribution of SARS-CoV-2 lineages among 166 genomes sequenced at the Centre  
201 Hospitalier Universitaire Bouaké in Côte d'Ivoire. Data were subdivided into sample  
202 collection periods: A) May – July 2020, B) August – December 2020, C) January – March  
203 2021, D) January 2021, E) February 2021, F) March 2021. Viral lineage assignment was  
204 conducted using pangolin [version 2.3.8, April 2nd 2021; (6)]. The treemap plot was drawn  
205 with R, package treemap (15).

206
